# Supplementary material
Source: PubMed Central journal article supplement (PMC2856845)
Supplement: NIHMS80837-supplement-01.pdf [file NIHMS80837-supplement-01.pdf]

Charge at:

|                          | pH 1.9 | pH 4.7 | pH 6.5       | pH 8.9 |
|--------------------------|--------|--------|--------------|--------|
| Aromatase phosphopeptide | (+)    | 0      | slightly (-) | (-)    |

**Tryptic digest, serine-containing peptides**

|                                      |      |       |       |       |
|--------------------------------------|------|-------|-------|-------|
| 1 -MFLEMLNPMQYNVTIMVPET ... - 64     | 1.97 | -1.16 | -2.82 | -6.3  |
| 65 -FLWMGIGSACNYYNK - 79             | 0.98 | 0.07  | -0.32 | -2.52 |
| 87 -VWISGEETLIISK - 99               | 0.97 | -1.41 | -2.3  | -3.7  |
| 100 -SSSMFHVMK - 108                 | 1.98 | 1.05  | 0.19  | -1.7  |
| 109 -HSHYISR - 115                   | 2.98 | 2.04  | 0.69  | -1.69 |
| 116 -FGSK - 119                      | 0.98 | 0.07  | -0.31 | -1.7  |
| 121 -GLQCIGMHENGIIFNNPSLWR - 142     | 1.97 | 0.31  | -0.82 | -3.48 |
| 160 -MVEVCVESIK - 169                | 0.97 | -1.41 | -2.31 | -4.5  |
| 175 -LGEVTDTSGYVDVLTLMR - 192        | 0.95 | -2.39 | -3.3  | -4.7  |
| 193 -HIMLDTSNMLFLGIPLDESAIVK - 215   | 1.95 | -1.41 | -2.8  | -4.7  |
| 237 -ISWLYR - 242                    | 0.98 | 0.07  | -0.31 | -1.7  |
| 247 -SVK - 249                       | 0.98 | 0.07  | -0.31 | -1.7  |
| 266 -VSTAEK - 271                    | 0.97 | -0.67 | -1.3  | -2.7  |
| 294 -ENVNQCILEMLIAAPDTMSVT ... - 334 | 0.95 | -4.48 | -6.29 | -8.52 |
| 355 -VVENFINESMR - 365               | 0.97 | -1.41 | -2.3  | -3.69 |
| 474 -KNDLSLHPNEDR - 485              | 2.95 | -0.41 | -1.8  | -3.7  |
| 486 -HLVEIIFSPR - 495                | 1.97 | 0.31  | -0.8  | -2.68 |
| 496 -NSADIQHSGGR - 506               | 1.97 | 0.19  | -0.8  | -2.19 |
| 507 -SSLEGPR - 513                   | 0.97 | -0.67 | -1.3  | -2.22 |
